# Supplementary material for: High-performance dissolved oxygen sensors based on platinum(ii) porphyrin embedded in polystyrene beads
Source: Royal Society of Chemistry journal article supplement (doi:10.1039/c7nj01025g), 2017-01-01
Supplement: c7nj01025g1.pdf [file c7nj01025g1.pdf]

## Supporting Information

### High-performance dissolved oxygen sensors based on platinum(II) porphyrin embedded in polystyrene beads

K. Zhang<sup>a</sup>, L. L. Luo<sup>a</sup>, W. J. Li<sup>a</sup>, H. L. Zhang<sup>a</sup>, Y. Zhang<sup>b</sup>, J. P. Zhao<sup>\*a</sup>, Y. Li<sup>\*b</sup>

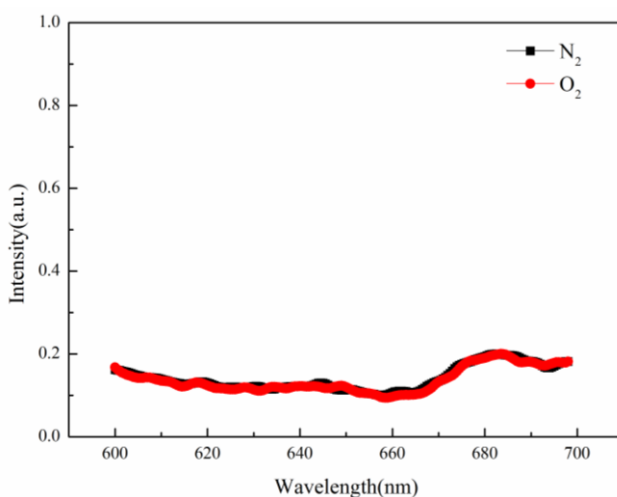

**Fig. S1** Emission spectra of pure PS emulsion at pH=7, with a saturation of oxygen or nitrogen

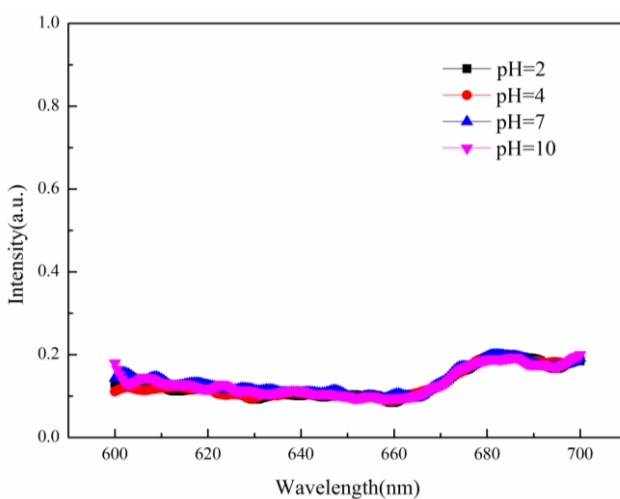

**Fig.S2** Emission spectra of pure PS emulsion at pH=2, 4, 7, and 10.
